# Supplementary material for: Phosphatidylcholine in Krill Meal and Krill Oil as a Source of Choline for Prevention of Intestinal Steatosis in Atlantic Salmon
Source: Hindawi journal article supplement (doi:10.1155/2023/4001633), 2023-02-07
Supplement: f1 [file 4001633.f1.pdf]

**Table S1. Fatty acid composition of the experimental diets as analyzed, g/kg**

|            | <b>Ref0</b> | <b>KO1</b> | <b>KO2</b> | <b>KM1</b> | <b>KM2</b> | <b>RefHigh</b> |
|------------|-------------|------------|------------|------------|------------|----------------|
| C12:0      | 0.14        | 0.15       | 0.14       | 0.20       | 0.19       | 0.15           |
| C14:0      | 10.16       | 11.19      | 11.00      | 13.03      | 12.56      | 10.52          |
| C15:0      | 0.78        | 0.83       | 0.85       | 0.80       | 0.85       | 0.81           |
| C16:0      | 23.88       | 26.43      | 25.81      | 27.37      | 29.35      | 24.98          |
| C16:1n7    | 6.68        | 7.56       | 7.33       | 8.23       | 8.42       | 7.07           |
| C17:0      | 0.58        | 0.63       | 0.60       | 0.60       | 0.62       | 0.62           |
| C18:0      | 4.02        | 4.32       | 4.37       | 4.02       | 4.50       | 4.26           |
| C18:1n9t   | 0.18        | 0.18       | 0.20       | 0.21       | 0.19       | 0.18           |
| C18:1n9c   | 48.86       | 56.02      | 54.23      | 50.11      | 59.91      | 54.27          |
| C18:2n6c   | 18.91       | 20.37      | 20.38      | 19.10      | 21.63      | 20.57          |
| C20:0      | 0.57        | 0.65       | 0.65       | 0.57       | 0.62       | 0.63           |
| C18:3n6    | 0.43        | 0.49       | 0.47       | 0.45       | 0.53       | 0.48           |
| C20:1      | 17.61       | 17.84      | 19.26      | 13.55      | 17.60      | 18.29          |
| C18:3n3    | 7.22        | 7.98       | 7.73       | 7.36       | 8.60       | 7.88           |
| C20:2n6    | 6.43        | 6.67       | 6.56       | 6.87       | 7.12       | 6.94           |
| C20:3n6    | 0.09        | 0.12       | 0.12       | 0.11       | 0.12       | 0.12           |
| C22:1n11   | 27.38       | 26.63      | 30.31      | 21.19      | 24.74      | 27.50          |
| C22:1n9    | 1.16        | 1.23       | 1.31       | 1.21       | 1.40       | 1.28           |
| C20:3n3    | 0.49        | 0.46       | 0.51       | 0.49       | 0.54       | 0.46           |
| C20:4n6    | 0.66        | 0.71       | 0.75       | 0.61       | 0.75       | 0.69           |
| C24:0      | 0.08        | 0.11       | 0.10       | 0.09       | 0.08       | 0.10           |
| C20:5n3    | 10.26       | 12.32      | 11.71      | 11.79      | 14.46      | 11.27          |
| C24:1      | 1.29        | 1.44       | 1.60       | 1.25       | 1.20       | 1.42           |
| C22:5n3    | 1.29        | 1.34       | 1.51       | 1.17       | 1.44       | 1.38           |
| C22:6n3    | 14.10       | 15.23      | 16.50      | 13.52      | 16.88      | 15.27          |
| sumEPA+DHA | 24.4        | 27.6       | 28.2       | 25.3       | 31.3       | 26.5           |
| sum n-3    | 33.4        | 37.3       | 38.0       | 34.3       | 41.9       | 36.3           |
| sum n-6    | 26.5        | 28.4       | 28.3       | 27.2       | 30.2       | 28.8           |
| n-3/n-6    | 1.3         | 1.3        | 1.3        | 1.3        | 1.4        | 1.3            |
| sum FA     | 203         | 221        | 224        | 204        | 234        | 217            |
